# Supplementary material for: Association between patient outcomes and accreditation in US hospitals: observational study
Source: PubMed Central journal article supplement — BMJ. 2018 Oct 18;363:k4011. doi: 10.1136/bmj.k4011 (PMC6193202; doi:10.1136/bmj.k4011), 2018-10-18
Supplement: lamm044844.ww.pdf [file lamm044844.ww.pdf]

## **Supplemental Appendix for “Patient Outcomes and Accreditation in U.S. Hospitals: An Observational Study”**

Lam MB, Figueroa JF, Feyman Y, Reimold KE, Orav EJ, Jha AK

**Appendix Table 1.** Common medical and surgical procedures and their associated diagnosis-related group (DRG) codes

**Appendix Table 2.** Number of Hospitalizations by Accreditation Status

**Appendix Table 3.** Characteristics of Patient and Hospitals by Accreditation Status (row percent)

**Appendix Table 4.** 30-Day Risk-Adjusted Mortality and 30-Day Risk-Adjusted Readmission Rates by Condition for Hospitals Accredited by Accrediting Organizations (AO) vs. Reviewed by State Survey Agencies

**Appendix Table 5.** 30-Day Risk-Adjusted Mortality and 30-Day Risk-Adjusted Readmission Rates by Condition for Hospitals Accredited by TJC vs. non-TJC

**Appendix Table 6.** 30-Day Risk-Adjusted<sup>a</sup> Mortality and 30-Day Risk-Adjusted<sup>a</sup> Readmission Rates for Hospitals Accredited by an Accrediting Organization (AO) vs. Reviewed by a State Survey Agency (2015)

**Appendix Table 7.** 30-Day Risk-Adjusted<sup>a</sup> Mortality and 30-Day Risk-Adjusted<sup>a</sup> Readmission Rates for Hospitals Accredited by TJC vs. non-TJC (2015)

**Appendix Table 8.** 30-Day Risk-Adjusted<sup>a</sup> Mortality and 30-Day Risk-Adjusted<sup>a</sup> Readmission Rates in 2015 for Hospitals Accredited by an Accrediting Organization (AO) vs. Reviewed by a State Survey Agency in 2014

**Appendix Table 9.** 30-Day Risk-Adjusted<sup>a</sup> Mortality and 30-Day Risk-Adjusted<sup>a</sup> Readmission Rates in 2015 for Hospitals Accredited by TJC vs. non-TJC in 2014

**Appendix Table 1.** Common medical and surgical procedures and their associated diagnosis-related group (DRG) codes

| Condition                             | Code | Code Description                                                     |
|---------------------------------------|------|----------------------------------------------------------------------|
| <b>Medical Condition</b>              |      |                                                                      |
| Acute Myocardial Infarction           | 280  | ACUTE MYOCARDIAL INFARCTION, DISCHARGED ALIVE W MCC                  |
|                                       | 281  | ACUTE MYOCARDIAL INFARCTION, DISCHARGED ALIVE W CC                   |
|                                       | 247  | PERC CARDIOVASC PROC W DRUG-ELUTING STENT W/O MCC                    |
|                                       | 282  | ACUTE MYOCARDIAL INFARCTION, DISCHARGED ALIVE W/O CC/MCC             |
|                                       | 246  | PERC CARDIOVASC PROC W DRUG-ELUTING STENT W MCC OR 4+ VESSELS/STENTS |
|                                       | 249  | PERC CARDIOVASC PROC W NON-DRUG-ELUTING STENT W/O MCC                |
|                                       | 283  | ACUTE MYOCARDIAL INFARCTION, EXPIRED W MCC                           |
| Heart Failure                         | 292  | HEART FAILURE & SHOCK W CC                                           |
|                                       | 291  | HEART FAILURE & SHOCK W MCC                                          |
|                                       | 293  | HEART FAILURE & SHOCK W/O CC/MCC                                     |
| Pneumonia                             | 194  | SIMPLE PNEUMONIA & PLEURISY W CC                                     |
|                                       | 193  | SIMPLE PNEUMONIA & PLEURISY W MCC                                    |
|                                       | 195  | SIMPLE PNEUMONIA & PLEURISY W/O CC/MCC                               |
| Chronic Obstructive Pulmonary Disease | 190  | CHRONIC OBSTRUCTIVE PULMONARY DISEASE W MCC                          |
|                                       | 191  | CHRONIC OBSTRUCTIVE PULMONARY DISEASE W CC                           |
|                                       | 192  | CHRONIC OBSTRUCTIVE PULMONARY DISEASE W/O CC/MCC                     |
| Stroke                                | 65   | INTRACRANIAL HEMORRHAGE OR CEREBRAL INFARCTION W CC                  |
|                                       | 64   | INTRACRANIAL HEMORRHAGE OR CEREBRAL INFARCTION W MCC                 |
|                                       | 66   | INTRACRANIAL HEMORRHAGE OR CEREBRAL INFARCTION W/O CC/MCC            |
| Sepsis                                | 871  | SEPTICEMIA OR SEVERE SEPSIS W/O MV 96+ HOURS W MCC                   |
|                                       | 872  | SEPTICEMIA OR SEVERE SEPSIS W/O MV 96+ HOURS W/O MCC                 |
| Esophageal/Gastric Disease            | 392  | ESOPHAGITIS, GASTROENT & MISC DIGEST DISORDERS W/O MCC               |
|                                       | 391  | ESOPHAGITIS, GASTROENT & MISC DIGEST DISORDERS W MCC                 |
|                                       | 372  | MAJOR GASTROINTESTINAL DISORDERS & PERITONEAL INFECTIONS W CC        |
|                                       | 371  | MAJOR GASTROINTESTINAL DISORDERS &                                   |

|                                               |     |                                                                      |
|-----------------------------------------------|-----|----------------------------------------------------------------------|
|                                               |     | PERITONEAL INFECTIONS W MCC                                          |
| Gastrointestinal Bleeding                     | 378 | G.I. HEMORRHAGE W CC                                                 |
|                                               | 377 | G.I. HEMORRHAGE W MCC                                                |
|                                               | 379 | G.I. HEMORRHAGE W/O CC/MCC                                           |
| Urinary Tract Infection                       | 690 | KIDNEY & URINARY TRACT INFECTIONS W/O MCC                            |
|                                               | 689 | KIDNEY & URINARY TRACT INFECTIONS W MCC                              |
| Metabolic Disease                             | 641 | NUTRITIONAL & MISC METABOLIC DISORDERS W/O MCC                       |
|                                               | 640 | NUTRITIONAL & MISC METABOLIC DISORDERS W MCC                         |
| Arrhythmia                                    | 310 | CARDIAC ARRHYTHMIA & CONDUCTION DISORDERS W/O CC/MCC                 |
|                                               | 309 | CARDIAC ARRHYTHMIA & CONDUCTION DISORDERS W CC                       |
|                                               | 308 | CARDIAC ARRHYTHMIA & CONDUCTION DISORDERS W MCC                      |
|                                               | 243 | PERMANENT CARDIAC PACEMAKER IMPLANT W CC                             |
|                                               | 244 | PERMANENT CARDIAC PACEMAKER IMPLANT W/O CC/MCC                       |
| Chest Pain                                    | 313 | CHEST PAIN                                                           |
|                                               | 0   |                                                                      |
|                                               | 287 | CIRCULATORY DISORDERS EXCEPT                                         |
| Renal Failure                                 | 683 | RENAL FAILURE W CC                                                   |
|                                               | 682 | RENAL FAILURE W MCC                                                  |
| Respiratory Disease                           | 177 | RESPIRATORY INFECTIONS & INFLAMMATIONS W MCC                         |
|                                               | 178 | RESPIRATORY INFECTIONS & INFLAMMATIONS W CC                          |
| Hip Fracture                                  | 481 | HIP & FEMUR PROCEDURES EXCEPT MAJOR JOINT W CC                       |
|                                               | 470 | MAJOR JOINT REPLACEMENT OR REATTACHMENT OF LOWER EXTREMITY W/O MCC   |
|                                               | 482 | HIP & FEMUR PROCEDURES EXCEPT MAJOR JOINT W/O CC/MCC                 |
|                                               | 480 | HIP & FEMUR PROCEDURES EXCEPT MAJOR JOINT W MCC                      |
| <b><i>Surgical Procedure</i></b>              |     |                                                                      |
| Coronary Artery Bypass Grafting               | 236 | CORONARY BYPASS W/O CARDIAC CATH W/O MCC                             |
|                                               | 234 | CORONARY BYPASS W CARDIAC CATH W/O MCC                               |
|                                               | 233 | CORONARY BYPASS W CARDIAC CATH W MCC                                 |
|                                               | 235 | CORONARY BYPASS W/O CARDIAC CATH W MCC                               |
| Open Abdominal Aortic Aneurysm Repair         | 238 | MAJOR CARDIOVASC PROCEDURES W/O MCC                                  |
|                                               | 237 | MAJOR CARDIOVASC PROCEDURES W MCC OR THORACIC AORTIC ANEURYSM REPAIR |
| Endovascular Abdominal Aortic Aneurysm Repair | 238 | MAJOR CARDIOVASC PROCEDURES W/O MCC                                  |
| Colectomy                                     | 330 | MAJOR SMALL & LARGE BOWEL PROCEDURES W CC                            |

|                     |     |                                                                    |
|---------------------|-----|--------------------------------------------------------------------|
|                     | 329 | MAJOR SMALL & LARGE BOWEL PROCEDURES W MCC                         |
|                     | 331 | MAJOR SMALL & LARGE BOWEL PROCEDURES W/O CC/MCC                    |
| Pulmonary Lobectomy | 164 | MAJOR CHEST PROCEDURES W CC                                        |
|                     | 165 | MAJOR CHEST PROCEDURES W/O CC/MCC                                  |
|                     | 163 | MAJOR CHEST PROCEDURES W MCC                                       |
| Hip Replacement     | 470 | MAJOR JOINT REPLACEMENT OR REATTACHMENT OF LOWER EXTREMITY W/O MCC |

**Appendix Table 2.** Number of Hospitalizations by Accreditation Status

|                                               | <b>TJC</b>       | <b>Non-TJC</b> | <b>State Survey</b> |
|-----------------------------------------------|------------------|----------------|---------------------|
| <b>Medical</b>                                | <b>3,018,718</b> | <b>414,470</b> | <b>161,267</b>      |
| Acute myocardial infarction                   | 215,961          | 29,751         | 5,548               |
| Heart failure                                 | 365,684          | 49,816         | 20,497              |
| Pneumonia                                     | 272,137          | 39,807         | 30,564              |
| Chronic obstructive pulmonary disease         | 246,561          | 34,967         | 19,639              |
| Stroke                                        | 11,173           | 1,349          | 105                 |
| Sepsis                                        | 459,785          | 62,435         | 15,977              |
| Esophageal/gastric disease                    | 348,724          | 47,353         | 16,819              |
| Gastrointestinal bleeding                     | 175,993          | 23,458         | 6,782               |
| Urinary tract infection                       | 191,069          | 25,775         | 15,508              |
| Metabolic disease                             | 134,191          | 17,916         | 10,394              |
| Arrhythmia                                    | 229,690          | 32,301         | 9,097               |
| Chest pain                                    | 136,837          | 18,564         | 3,405               |
| Renal failure                                 | 200,289          | 27,393         | 5,678               |
| Respiratory disease                           | 88,708           | 11,121         | 3,816               |
| Hip fracture                                  | 104,146          | 14,120         | 2,969               |
| <b>Surgical</b>                               | <b>549,135</b>   | <b>78,467</b>  | <b>20,627</b>       |
| Coronary artery bypass grafting               | 44,099           | 6,542          | 685                 |
| Open abdominal aortic aneurysm repair         | 15,008           | 1,952          | 154                 |
| Endovascular abdominal aortic aneurysm repair | 26,830           | 3,716          | 453                 |
| Colectomy                                     | 88,231           | 11,541         | 2,488               |
| Pulmonary lobectomy                           | 29,837           | 3,303          | 284                 |
| Hip replacement                               | 345,130          | 51,413         | 16,563              |

**Appendix Table 3.** Characteristics of Patient and Hospitals by Accreditation Status (row percent)

|                                         | <b>TJC</b>  |     | <b>Non-TJC</b> |     | <b>State Survey</b> |     |
|-----------------------------------------|-------------|-----|----------------|-----|---------------------|-----|
| <b>Hospitalizations, No.</b>            | 3,567,853   |     | 492,937        |     | 181,894             |     |
| <b>Hospital Characteristics</b>         |             |     |                |     |                     |     |
| <b>Hospitals, No.</b>                   | 2,847       |     | 490            |     | 1,063               |     |
| <b>Size, No., %</b>                     |             |     |                |     |                     |     |
| Small (1-99 beds)                       | 975         | 44% | 241            | 11% | 987                 | 45% |
| Medium (100-399 beds)                   | 1,469       | 84% | 206            | 12% | 72                  | 4%  |
| Large (400+ beds)                       | 403         | 90% | 43             | 10% | 4                   | 1%  |
| <b>Ownership, No., %</b>                |             |     |                |     |                     |     |
| For-Profit                              | 629         | 79% | 79             | 10% | 93                  | 12% |
| Non-For-Profit                          | 1,859       | 70% | 281            | 11% | 507                 | 19% |
| Government, Federal                     | 359         | 38% | 130            | 14% | 463                 | 49% |
| <b>Teaching Status, No., %</b>          |             |     |                |     |                     |     |
| Major                                   | 216         | 92% | 18             | 8%  | 0                   | 0%  |
| Minor                                   | 779         | 82% | 105            | 11% | 67                  | 7%  |
| Non-Teaching                            | 1852        | 58% | 367            | 11% | 996                 | 31% |
| <b>Region, No., %</b>                   |             |     |                |     |                     |     |
| Northeast                               | 420         | 76% | 53             | 10% | 83                  | 15% |
| Midwest                                 | 725         | 54% | 169            | 13% | 441                 | 33% |
| South                                   | 1,155       | 70% | 164            | 10% | 323                 | 20% |
| West                                    | 547         | 63% | 104            | 12% | 216                 | 25% |
| <b>Urban, No., %</b>                    |             |     |                |     |                     |     |
| Rural                                   | 294         | 28% | 79             | 8%  | 664                 | 64% |
| Urban                                   | 2553        | 76% | 411            | 12% | 399                 | 12% |
| <b>Critical Access Hospital, No., %</b> | 342         | 28% | 106            | 9%  | 785                 | 64% |
| <b>Intensive Care Unit, No., %</b>      | 2,078       | 78% | 303            | 11% | 293                 | 11% |
| <b>Patient Characteristics</b>          |             |     |                |     |                     |     |
| <b>Age, mean (SD), y</b>                | 75.6 (12.3) |     | 75.5 (12.1)    |     | 77.1 (11.7)         |     |
| <b>Race/ethnicity, No., %</b>           |             |     |                |     |                     |     |
| White                                   | 2,861,168   | 83% | 404,960        | 12% | 162,492             | 5%  |
| Black                                   | 403,020     | 87% | 51,357         | 11% | 10,101              | 2%  |
| Hispanic                                | 191,234     | 87% | 22,572         | 10% | 4,871               | 2%  |
| Other                                   | 112,431     | 86% | 14,048         | 11% | 4,430               | 3%  |
| <b>Women, No., %</b>                    | 2,042,140   | 84% | 281,696        | 12% | 107,576             | 4%  |
| <b>Medicaid eligible, No., %</b>        | 950,660     | 84% | 125,250        | 11% | 54,709              | 5%  |
| <b>Comorbidity, No., %</b>              |             |     |                |     |                     |     |
| CHF                                     | 365,684     | 84% | 49,816         | 11% | 20,497              | 5%  |
| Diabetes Mellitus                       | 949,412     | 84% | 135,054        | 12% | 47,544              | 4%  |
| Renal Failure                           | 783,212     | 85% | 107,742        | 12% | 29,544              | 3%  |
| Liver Disease                           | 78,080      | 87% | 9,827          | 11% | 2,187               | 2%  |
| Depression                              | 402,927     | 85% | 53,691         | 11% | 19,223              | 4%  |

**Appendix Table 4.** 30-Day Risk-Adjusted Mortality and 30-Day Risk-Adjusted Readmission Rates by Condition for Hospitals Accredited by Accrediting Organizations (AO) vs. Reviewed by State Survey Agencies

|                                               | <b>AO-Accredited<br/>% [95% CI]</b> | <b>State Survey<br/>% [95% CI]</b> | <b>Difference<br/>% [95% CI]</b> | <b>p-value</b> |
|-----------------------------------------------|-------------------------------------|------------------------------------|----------------------------------|----------------|
| <b>30-Day Mortality</b>                       |                                     |                                    |                                  |                |
| <b>Medical</b>                                | <b>10.2%</b><br>[10.11% - 10.24%]   | <b>10.6%</b><br>[10.2% - 10.9%]    | <b>-0.4%</b><br>[-0.8% - -0.1%]  | 0.03           |
| Acute myocardial infarction                   | <b>10.4%</b><br>[10.2% - 10.5%]     | <b>11.7%</b><br>[10.2% - 13.1%]    | <b>-1.3%</b><br>[-2.7% - -0.2%]  | 0.09           |
| Heart failure                                 | <b>10.9%</b><br>[10.8% - 11.0%]     | <b>10.9%</b><br>[10.2% - 11.6%]    | <b>0.03%</b><br>[-0.7% - 0.8%]   | 0.94           |
| Pneumonia                                     | <b>9.3%</b><br>[9.2% - 9.4%]        | <b>9.6%</b><br>[9.0% - 10.2%]      | <b>-0.3%</b><br>[-0.9% - 0.3%]   | 0.32           |
| Chronic obstructive pulmonary disease         | <b>4.2%</b><br>[4.1% - 4.3%]        | <b>4.5%</b><br>[4.1% - 5.0%]       | <b>-0.3%</b><br>[-0.8% - 0.1%]   | 0.16           |
| Stroke                                        | <b>19.2%</b><br>[18.6% - 19.7%]     | <b>15.3%</b><br>[4.9% - 25.8%]     | <b>3.8%</b><br>[-6.7% - 14.4%]   | 0.48           |
| Sepsis                                        | <b>22.6%</b><br>[22.4% - 22.8%]     | <b>22.5%</b><br>[21.5% - 23.6%]    | <b>0.03%</b><br>[-1.1% - 1.1%]   | 0.95           |
| Esophageal/gastric disease                    | <b>9.2%</b><br>[9.1% - 9.3%]        | <b>9.2%</b><br>[8.5% - 9.8%]       | <b>0.05%</b><br>[-0.6% - 0.7%]   | 0.88           |
| Gastrointestinal bleeding                     | <b>6.7%</b><br>[6.6% - 6.8%]        | <b>7.0%</b><br>[6.1% - 7.8%]       | <b>-0.3%</b><br>[-1.1% - 0.5%]   | 0.50           |
| Urinary tract infection                       | <b>5.6%</b><br>[5.5% - 5.7%]        | <b>5.9%</b><br>[5.3% - 6.5%]       | <b>-0.3%</b><br>[-0.9% - 0.3%]   | 0.36           |
| Metabolic disease                             | <b>8.9%</b><br>[8.8% - 9.1%]        | <b>8.9%</b><br>[8.1% - 9.7%]       | <b>0.3%</b><br>[-0.8% - 0.9%]    | 0.95           |
| Arrhythmia                                    | <b>4.8%</b><br>[4.7% - 4.9%]        | <b>4.9%</b><br>[4.2% - 5.5%]       | <b>-0.1%</b><br>[-0.7% - 0.5%]   | 0.75           |
| Chest pain                                    | <b>2.4%</b><br>[2.3% - 2.5%]        | <b>2.9%</b><br>[2.2% - 3.6%]       | <b>-0.5%</b><br>[-1.2% - 0.2%]   | 0.18           |
| Renal failure                                 | <b>11.8%</b><br>[11.7% - 11.9%]     | <b>13.9%</b><br>[12.4% - 15.4%]    | <b>-2.1%</b><br>[-3.6% - -0.6%]  | 0.008          |
| Respiratory disease                           | <b>22.0%</b><br>[21.7% - 22.3%]     | <b>22.2%</b><br>[20.4% - 24.0%]    | <b>-0.2%</b><br>[-2.1% - 1.7%]   | 0.83           |
| Hip fracture                                  | <b>1.7%</b><br>[1.69% - 1.78%]      | <b>1.9%</b><br>[1.6% - 2.2%]       | <b>-0.2%</b><br>[-0.5% - 0.1%]   | 0.27           |
| <b>Surgical</b>                               | <b>2.4%</b><br>[2.33% - 2.42%]      | <b>2.4%</b><br>[2.1% - 2.7%]       | <b>0.001%</b><br>[-0.3% - 0.3%]  | 0.99           |
| Coronary artery bypass grafting               | <b>2.3%</b><br>[2.2% - 2.4%]        | <b>3.7%</b><br>[1.9% - 5.5%]       | <b>-1.4%</b><br>[-3.2% - 0.4%]   | 0.13           |
| Open abdominal aortic aneurysm repair         | <b>23.8%</b><br>[23.2% - 24.5%]     | <b>28.8%</b><br>[19.1% - 38.4%]    | <b>-4.9%</b><br>[-14.7% - 4.8%]  | 0.32           |
| Endovascular abdominal aortic aneurysm repair | <b>2.7%</b><br>[2.5% - 2.9%]        | <b>4.1%</b><br>[2.0% - 6.3%]       | <b>-1.5%</b><br>[-3.6% - 0.7%]   | 0.18           |
| Colectomy                                     | <b>5.8%</b><br>[5.7% - 6.0%]        | <b>5.7%</b><br>[4.5% - 6.9%]       | <b>0.1%</b><br>[-1.1% - 1.3%]    | 0.88           |
| Pulmonary lobectomy                           | <b>4.4%</b><br>[4.2% - 4.6%]        | <b>3.9%</b><br>[0.4% - 7.4%]       | <b>0.4%</b><br>[-3.1% - 4.0%]    | 0.80           |

|                                               |                                 |                                 |                                   |        |
|-----------------------------------------------|---------------------------------|---------------------------------|-----------------------------------|--------|
| Hip replacement                               | <b>0.5%</b><br>[0.50% - 0.55%]  | <b>0.6%</b><br>[0.4% - 0.7%]    | <b>-0.04%</b><br>[-0.2% - 0.1%]   | 0.62   |
| <b>30-Day Readmissions</b>                    |                                 |                                 |                                   |        |
| <b>Medical</b>                                | <b>22.4%</b><br>[22.3% - 22.5%] | <b>23.2%</b><br>[22.8% - 23.7%] | <b>-0.9%</b><br>[-1.3% - -0.4%]   | <0.001 |
| Acute myocardial infarction                   | <b>24.6%</b><br>[24.2% - 24.9%] | <b>23.9%</b><br>[21.8% - 26.1%] | <b>0.6%</b><br>[-1.5% - 2.8%]     | 0.57   |
| Heart failure                                 | <b>26.2%</b><br>[26.0% - 26.4%] | <b>27.1%</b><br>[26.3% - 28.0%] | <b>-0.9%</b><br>[-1.8% - -0.02%]  | 0.05   |
| Pneumonia                                     | <b>19.4%</b><br>[19.3% - 19.6%] | <b>20.5%</b><br>[19.8% - 21.3%] | <b>-1.1%</b><br>[-1.9% - -0.3%]   | 0.008  |
| Chronic obstructive pulmonary disease         | <b>22.0%</b><br>[21.8% - 22.2%] | <b>21.8%</b><br>[20.9% - 22.6%] | <b>0.2%</b><br>[-0.7% - 1.1%]     | 0.61   |
| Stroke                                        | <b>36.2%</b><br>[35.5% - 37.0%] | <b>41.8%</b><br>[34.4% - 49.2%] | <b>-5.6%</b><br>[-13.1% - 1.9%]   | 0.14   |
| Sepsis                                        | <b>21.7%</b><br>[21.5% - 21.9%] | <b>23.0%</b><br>[21.9% - 24.1%] | <b>-1.3%</b><br>[-2.4% - -0.2%]   | 0.02   |
| Esophageal/gastric disease                    | <b>23.5%</b><br>[23.3% - 23.6%] | <b>24.3%</b><br>[23.4% - 25.3%] | <b>-0.9%</b><br>[-1.8% - 0.1%]    | 0.07   |
| Gastrointestinal bleeding                     | <b>20.1%</b><br>[19.9% - 20.3%] | <b>23.5%</b><br>[22.1% - 24.9%] | <b>-3.4%</b><br>[-4.8% - 2.0%]    | <0.001 |
| Urinary tract infection                       | <b>19.8%</b><br>[19.6% - 20.0%] | <b>20.2%</b><br>[19.3% - 21.1%] | <b>-0.4%</b><br>[-1.4% - 0.5%]    | 0.36   |
| Metabolic disease                             | <b>23.1%</b><br>[22.9% - 23.3%] | <b>23.8%</b><br>[22.7% - 25.0%] | <b>-0.7%</b><br>[-2.0% - 0.5%]    | 0.25   |
| Arrhythmia                                    | <b>19.4%</b><br>[19.2% - 19.6%] | <b>20.5%</b><br>[19.2% - 21.9%] | <b>-1.1%</b><br>[-2.5% - 0.2%]    | 0.10   |
| Chest pain                                    | <b>20.8%</b><br>[20.6% - 21.1%] | <b>22.4%</b><br>[20.5% - 24.2%] | <b>-1.6%</b><br>[-3.4% - 0.3%]    | 0.11   |
| Renal failure                                 | <b>25.1%</b><br>[24.9% - 25.3%] | <b>26.0%</b><br>[24.3% - 27.8%] | <b>-0.9%</b><br>[-2.7% - 0.8%]    | 0.30   |
| Respiratory disease                           | <b>23.9%</b><br>[23.6% - 24.2%] | <b>23.9%</b><br>[22.1% - 25.7%] | <b>-0.03%</b><br>[-1.9% - 1.8%]   | 0.98   |
| Hip fracture                                  | <b>17.3%</b><br>[16.9% - 17.7%] | <b>16.4%</b><br>[14.6% - 18.1%] | <b>0.9%</b><br>[-0.8% - 2.7%]     | 0.29   |
| <b>Surgical</b>                               | <b>15.9%</b><br>[15.6% - 16.1%] | <b>15.6%</b><br>[14.2% - 17.0%] | <b>0.2%</b><br>[-1.2% - 1.6%]     | 0.75   |
| Coronary artery bypass grafting               | <b>22.7%</b><br>[22.2% - 23.2%] | <b>27.2%</b><br>[19.4% - 35.0%] | <b>-4.5%</b><br>[-12.4% - 3.4%]   | 0.26   |
| Open abdominal aortic aneurysm repair         | <b>29.4%</b><br>[28.8% - 30.0%] | <b>36.0%</b><br>[26.8% - 45.2%] | <b>-6.6%</b><br>[-15.9% - 2.7%]   | 0.16   |
| Endovascular abdominal aortic aneurysm repair | <b>15.5%</b><br>[15.2% - 15.9%] | <b>17.0%</b><br>[11.9% - 22.1%] | <b>-1.4%</b><br>[-6.6% - 3.7%]    | 0.59   |
| Colectomy                                     | <b>19.5%</b><br>[19.2% - 19.8%] | <b>19.3%</b><br>[17.4% - 21.2%] | <b>0.2%</b><br>[-1.7% - 2.2%]     | 0.83   |
| Pulmonary lobectomy                           | <b>15.6%</b><br>[15.2% - 16.0%] | <b>26.1%</b><br>[20.9% - 31.4%] | <b>-10.5%</b><br>[-15.8% - -5.3%] | <0.001 |
| Hip replacement                               | <b>13.9%</b><br>[13.6% - 14.3%] | <b>13.1%</b><br>[11.4% - 14.7%] | <b>0.8%</b><br>[-0.8% - 2.5%]     | 0.32   |

Note: Adjusted for patient and hospital characteristics and HRR fixed effects.

**Appendix Table 5.** 30-Day Risk-Adjusted Mortality and 30-Day Risk-Adjusted Readmission Rates by Condition for Hospitals Accredited by TJC vs. non-TJC

|                                               | <b>TJC</b><br>% [95% CI]          | <b>Non-TJC</b><br>% [95% CI]    | <b>Difference</b><br>% [95% CI] | <b>p-value</b> |
|-----------------------------------------------|-----------------------------------|---------------------------------|---------------------------------|----------------|
| <b>30-Day Mortality</b>                       |                                   |                                 |                                 |                |
| <b>Medical</b>                                | <b>10.1%</b><br>[10.07% - 10.21%] | <b>10.3%</b><br>[10.1% - 10.5%] | <b>-0.2%</b><br>[-0.4% - 0.1%]  | 0.18           |
| Acute myocardial infarction                   | <b>10.4%</b><br>[10.3% - 10.6%]   | <b>10.3%</b><br>[9.9% - 10.8%]  | <b>0.1%</b><br>[-0.4% - 0.6%]   | 0.69           |
| Heart failure                                 | <b>10.9%</b><br>[10.8% - 11.0%]   | <b>11.0%</b><br>[10.7% - 11.3%] | <b>-0.1%</b><br>[-0.5% - 0.2%]  | 0.56           |
| Pneumonia                                     | <b>9.2%</b><br>[9.1% - 9.4%]      | <b>9.7%</b><br>[9.4% - 10.0%]   | <b>-0.4%</b><br>[-0.8% - -0.1%] | 0.02           |
| Chronic obstructive pulmonary disease         | <b>4.2%</b><br>[4.1% - 4.3%]      | <b>4.3%</b><br>[4.1% - 4.5%]    | <b>-0.1%</b><br>[-0.4% - 0.1%]  | 0.32           |
| Stroke                                        | <b>19.3%</b><br>[18.7% - 19.9%]   | <b>17.9%</b><br>[15.8% - 20.1%] | <b>1.4%</b><br>[-1.0% - 3.7%]   | 0.25           |
| Sepsis                                        | <b>22.6%</b><br>[22.4% - 22.8%]   | <b>22.6%</b><br>[22.1% - 23.1%] | <b>-0.1%</b><br>[-0.6% - 0.5%]  | 0.84           |
| Esophageal/gastric disease                    | <b>9.2%</b><br>[9.1% - 9.3%]      | <b>9.3%</b><br>[9.1% - 9.6%]    | <b>-0.1%</b><br>[-0.4% - 0.2%]  | 0.36           |
| Gastrointestinal bleeding                     | <b>6.6%</b><br>[6.5% - 6.7%]      | <b>7.0%</b><br>[6.7% - 7.4%]    | <b>-0.4%</b><br>[-0.8% - -0.1%] | 0.02           |
| Urinary tract infection                       | <b>5.7%</b><br>[5.6% - 5.8%]      | <b>5.6%</b><br>[5.3% - 5.9%]    | <b>0.1%</b><br>[-0.2% - 0.4%]   | 0.59           |
| Metabolic disease                             | <b>8.9%</b><br>[8.7% - 9.1%]      | <b>9.0%</b><br>[8.6% - 9.4%]    | <b>-0.1%</b><br>[-0.6% - 0.3%]  | 0.54           |
| Arrhythmia                                    | <b>4.8%</b><br>[4.7% - 4.9%]      | <b>4.7%</b><br>[4.5% - 5.0%]    | <b>0.1%</b><br>[-0.2% - 0.4%]   | 0.62           |
| Chest pain                                    | <b>2.4%</b><br>[2.3% - 2.5%]      | <b>2.4%</b><br>[2.2% - 2.7%]    | <b>-0.1%</b><br>[-0.4% - 0.2%]  | 0.65           |
| Renal failure                                 | <b>11.7%</b><br>[11.6% - 11.9%]   | <b>12.4%</b><br>[11.9% - 12.8%] | <b>-0.6%</b><br>[-1.1% - -0.2%] | 0.010          |
| Respiratory disease                           | <b>21.9%</b><br>[21.6% - 22.2%]   | <b>22.6%</b><br>[21.7% - 23.4%] | <b>-0.6%</b><br>[-1.6% - 0.3%]  | 0.17           |
| Hip fracture                                  | <b>1.7%</b><br>[1.69% - 1.79%]    | <b>1.7%</b><br>[1.6% - 1.9%]    | <b>0.002%</b><br>[-0.1% - 0.1%] | 0.97           |
| <b>Surgical</b>                               | <b>2.4%</b><br>[2.35% - 2.45%]    | <b>2.4%</b><br>[2.2% - 2.5%]    | <b>0.01%</b><br>[-0.2% - 0.2%]  | 0.92           |
| Coronary artery bypass grafting               | <b>2.3%</b><br>[2.1% - 2.4%]      | <b>2.7%</b><br>[2.1% - 3.2%]    | <b>-0.4%</b><br>[-1.0% - 0.2%]  | 0.22           |
| Open abdominal aortic aneurysm repair         | <b>23.9%</b><br>[23.2% - 24.6%]   | <b>23.7%</b><br>[21.6% - 25.8%] | <b>0.2%</b><br>[-2.2% - 2.6%]   | 0.87           |
| Endovascular abdominal aortic aneurysm repair | <b>2.8%</b><br>[2.6% - 3.0%]      | <b>2.1%</b><br>[1.5% - 2.6%]    | <b>0.8%</b><br>[0.1% - 1.4%]    | 0.02           |
| Colectomy                                     | <b>5.9%</b><br>[5.7% - 6.0%]      | <b>5.6%</b><br>[5.2% - 6.1%]    | <b>0.2%</b><br>[-0.3% - 0.7%]   | 0.42           |
| Pulmonary lobectomy                           | <b>4.4%</b><br>[4.1% - 4.6%]      | <b>4.4%</b><br>[3.6% - 5.2%]    | <b>-0.03%</b><br>[-0.9% - 0.8%] | 0.95           |
| Hip replacement                               | <b>0.5%</b>                       | <b>0.5%</b>                     | <b>0.02%</b>                    | 0.69           |

|                                               | [0.51% - 0.56%]                 | [0.45% - 0.59%]                 | [-0.1% - 0.1%]                  |       |
|-----------------------------------------------|---------------------------------|---------------------------------|---------------------------------|-------|
|                                               | <b>30-Day Readmissions</b>      |                                 |                                 |       |
| <b>Medical</b>                                | <b>22.4%</b><br>[22.3% - 22.5%] | <b>22.4%</b><br>[22.1% - 22.8%] | <b>-0.1%</b><br>[-0.5% - 0.3%]  | 0.73  |
| Acute myocardial infarction                   | <b>24.6%</b><br>[24.1% - 25.0%] | <b>24.5%</b><br>[23.5% - 25.5%] | <b>0.02%</b><br>[-1.1% - 1.1%]  | 0.97  |
| Heart failure                                 | <b>26.2%</b><br>[26.0% - 26.4%] | <b>26.6%</b><br>[26.2% - 27.1%] | <b>-0.4%</b><br>[-1.0% - 0.1%]  | 0.09  |
| Pneumonia                                     | <b>19.4%</b><br>[19.2% - 19.6%] | <b>20.1%</b><br>[19.6% - 20.5%] | <b>-0.7%</b><br>[-1.2% - -0.2%] | 0.008 |
| Chronic obstructive pulmonary disease         | <b>22.0%</b><br>[21.8% - 22.2%] | <b>21.8%</b><br>[21.3% - 22.2%] | <b>0.2%</b><br>[-0.3% - 0.8%]   | 0.36  |
| Stroke                                        | <b>35.9%</b><br>[35.0% - 36.8%] | <b>38.5%</b><br>[35.5% - 41.5%] | <b>-2.6%</b><br>[-5.9% - 0.7%]  | 0.13  |
| Sepsis                                        | <b>21.7%</b><br>[21.5% - 21.9%] | <b>22.0%</b><br>[21.6% - 22.5%] | <b>-0.4%</b><br>[-0.9% - 0.1%]  | 0.15  |
| Esophageal/gastric disease                    | <b>23.4%</b><br>[23.2% - 23.6%] | <b>23.8%</b><br>[23.4% - 24.2%] | <b>-0.4%</b><br>[-0.9% - 0.1%]  | 0.11  |
| Gastrointestinal bleeding                     | <b>20.2%</b><br>[20.0% - 20.4%] | <b>20.3%</b><br>[19.8% - 20.9%] | <b>-0.1%</b><br>[-0.7% - 0.5%]  | 0.73  |
| Urinary tract infection                       | <b>19.9%</b><br>[19.6% - 20.1%] | <b>19.7%</b><br>[19.2% - 20.2%] | <b>0.1%</b><br>[-0.5% - 0.7%]   | 0.67  |
| Metabolic disease                             | <b>23.0%</b><br>[22.8% - 23.3%] | <b>23.8%</b><br>[23.2% - 24.3%] | <b>-0.7%</b><br>[-1.4% - -0.1%] | 0.03  |
| Arrhythmia                                    | <b>19.4%</b><br>[19.2% - 19.6%] | <b>19.7%</b><br>[19.2% - 20.3%] | <b>-0.4%</b><br>[-1.0% - 0.2%]  | 0.20  |
| Chest pain                                    | <b>20.8%</b><br>[20.5% - 21.1%] | <b>21.0%</b><br>[20.2% - 21.7%] | <b>-0.2%</b><br>[-1.0% - 0.7%]  | 0.70  |
| Renal failure                                 | <b>25.1%</b><br>[24.9% - 25.4%] | <b>25.2%</b><br>[24.6% - 25.8%] | <b>-0.03%</b><br>[-0.7% - 0.6%] | 0.92  |
| Respiratory disease                           | <b>24.0%</b><br>[23.7% - 24.3%] | <b>23.5%</b><br>[22.8% - 24.3%] | <b>0.5%</b><br>[-0.4% - 1.3%]   | 0.28  |
| Hip fracture                                  | <b>17.4%</b><br>[16.9% - 17.8%] | <b>17.0%</b><br>[16.0% - 17.9%] | <b>0.4%</b><br>[-0.6% - 1.4%]   | 0.44  |
| <b>Surgical</b>                               | <b>16.0%</b><br>[15.7% - 16.2%] | <b>15.8%</b><br>[15.0% - 16.7%] | <b>0.1%</b><br>[-0.8% - 1.0%]   | 0.78  |
| Coronary artery bypass grafting               | <b>22.8%</b><br>[22.2% - 23.3%] | <b>22.9%</b><br>[21.1% - 24.8%] | <b>-0.2%</b><br>[-2.2% - 1.9%]  | 0.88  |
| Open abdominal aortic aneurysm repair         | <b>29.5%</b><br>[28.8% - 30.2%] | <b>29.1%</b><br>[27.0% - 31.1%] | <b>0.5%</b><br>[-1.8% - 2.8%]   | 0.68  |
| Endovascular abdominal aortic aneurysm repair | <b>15.5%</b><br>[15.0% - 15.9%] | <b>16.1%</b><br>[14.8% - 17.5%] | <b>-0.7%</b><br>[-2.2% - 0.9%]  | 0.39  |
| Colectomy                                     | <b>19.5%</b><br>[19.2% - 19.8%] | <b>19.6%</b><br>[18.8% - 20.4%] | <b>-0.1%</b><br>[-1.0% - 0.8%]  | 0.90  |
| Pulmonary lobectomy                           | <b>15.7%</b><br>[15.3% - 16.2%] | <b>15.4%</b><br>[14.1% - 16.8%] | <b>0.3%</b><br>[-1.3% - 1.9%]   | 0.71  |
| Hip replacement                               | <b>14.0%</b><br>[13.6% - 14.4%] | <b>13.6%</b><br>[12.8% - 14.5%] | <b>0.3%</b><br>[-0.7% - 1.3%]   | 0.53  |

Note: Adjusted for patient and hospital characteristics and HRR fixed effects.

**Appendix Table 6.** 30-Day Risk-Adjusted<sup>a</sup> Mortality and 30-Day Risk-Adjusted<sup>a</sup> Readmission Rates for Hospitals Accredited by an Accrediting Organization (AO) vs. Reviewed by a State Survey Agency (2015 Medicare data)

|                            | <b>AO</b><br>% [95% CI]         | <b>State Survey</b><br>% [95% CI] | <b>Difference</b><br>% [95% CI] | <b>p-value<sup>b</sup></b> |
|----------------------------|---------------------------------|-----------------------------------|---------------------------------|----------------------------|
| <b>30-Day Mortality</b>    |                                 |                                   |                                 |                            |
| <b>Medical</b>             | <b>10.3%</b><br>[10.2% - 10.4%] | <b>10.6%</b><br>[10.3% - 10.9%]   | <b>-0.3%</b><br>[-0.7% - 0.04%] | 0.08                       |
| <b>Surgical</b>            | <b>2.14%</b><br>[2.09% - 2.18%] | <b>2.07%</b><br>[1.8% - 2.4%]     | <b>0.07%</b><br>[-0.2% - 0.4%]  | 0.67                       |
| <b>30-Day Readmissions</b> |                                 |                                   |                                 |                            |
| <b>Medical</b>             | <b>22.3%</b><br>[22.2% - 22.4%] | <b>22.9%</b><br>[22.4% - 23.4%]   | <b>-0.6%</b><br>[-1.1% - -0.1%] | 0.02                       |
| <b>Surgical</b>            | <b>14.9%</b><br>[14.7% - 15.2%] | <b>14.3%</b><br>[13.0% - 15.6%]   | <b>0.7%</b><br>[-0.6% - 2.0%]   | 0.30                       |

<sup>a</sup>Adjusted for patient and hospital characteristics and HRR fixed effects.

<sup>b</sup>A p-value less than 0.0125 was considered significant.

**Appendix Table 7.** 30-Day Risk-Adjusted<sup>a</sup> Mortality and 30-Day Risk-Adjusted<sup>a</sup> Readmission Rates for Hospitals Accredited by TJC vs. non-TJC (2015 Medicare data)

|                            | <b>TJC</b><br>% [95% CI]        | <b>Non-TJC</b><br>% [95% CI]    | <b>Difference</b><br>% [95% CI] | <b>p-value<sup>b</sup></b> |
|----------------------------|---------------------------------|---------------------------------|---------------------------------|----------------------------|
| <b>30-Day Mortality</b>    |                                 |                                 |                                 |                            |
| <b>Medical</b>             | <b>10.3%</b><br>[10.2% - 10.4%] | <b>10.2%</b><br>[10.0% - 10.5%] | <b>0.04%</b><br>[-0.2% - 0.3%]  | 0.75                       |
| <b>Surgical</b>            | <b>2.15%</b><br>[2.10% - 2.20%] | <b>2.2%</b><br>[2.0% - 2.3%]    | <b>-0.03%</b><br>[-0.2% - 0.1%] | 0.72                       |
| <b>30-Day Readmissions</b> |                                 |                                 |                                 |                            |
| <b>Medical</b>             | <b>22.3%</b><br>[22.1% - 22.4%] | <b>22.4%</b><br>[22.0% - 22.8%] | <b>-0.1%</b><br>[-0.5% - 0.3%]  | 0.51                       |
| <b>Surgical</b>            | <b>15.0%</b><br>[14.7% - 15.3%] | <b>15.1%</b><br>[14.3% - 15.9%] | <b>-0.1%</b><br>[-0.9% - 0.7%]  | 0.82                       |

<sup>a</sup>Adjusted for patient and hospital characteristics and HRR fixed effects.

<sup>b</sup>A p-value less than 0.0125 was considered significant.

**Appendix Table 8.** 30-Day Risk-Adjusted<sup>a</sup> Mortality and 30-Day Risk-Adjusted<sup>a</sup> Readmission Rates for Hospitals Accredited by an Accrediting Organization (AO) vs. Reviewed by a State Survey Agency (2015 Medicare data for 2014 accreditation)

|                            | <b>AO</b><br>% [95% CI]        | <b>State Survey</b><br>% [95% CI] | <b>Difference</b><br>% [95% CI]  | <b>p-value<sup>b</sup></b> |
|----------------------------|--------------------------------|-----------------------------------|----------------------------------|----------------------------|
| <b>30-Day Mortality</b>    |                                |                                   |                                  |                            |
| <b>Medical</b>             | <b>10.3%</b><br>[10.17-10.45%] | <b>10.8%</b><br>[10.40-11.20%]    | <b>-0.49%</b><br>[-0.96- -0.02%] | 0.04                       |
| <b>Surgical</b>            | <b>2.0%</b><br>[1.90-2.07%]    | <b>2.1%</b><br>[1.70-2.47%]       | <b>-0.10%</b><br>[-0.54-0.34%]   | 0.66                       |
| <b>30-Day Readmissions</b> |                                |                                   |                                  |                            |
| <b>Medical</b>             | <b>21.9%</b><br>[21.67-22.16%] | <b>22.8%</b><br>[22.13-23.43%]    | <b>-0.87%</b><br>[-1.61- -0.13%] | 0.02                       |
| <b>Surgical</b>            | <b>13.7%</b><br>[13.24-14.13%] | <b>13.1%</b><br>[11.38-14.77%]    | <b>0.61%</b><br>[-1.27-2.49%]    | 0.52                       |

<sup>a</sup>Adjusted for patient and hospital characteristics and HRR fixed effects.

<sup>b</sup>A p-value less than 0.0125 was considered significant.

**Appendix Table 9.** 30-Day Risk-Adjusted<sup>a</sup> Mortality and 30-Day Risk-Adjusted<sup>a</sup> Readmission Rates for Hospitals Accredited by TJC vs. non-TJC (2015 Medicare data for 2014 accreditation)

|                            | <b>TJC</b><br>% [95% CI]       | <b>Non-TJC</b><br>% [95% CI]   | <b>Difference</b><br>% [95% CI] | <b>p-value<sup>b</sup></b> |
|----------------------------|--------------------------------|--------------------------------|---------------------------------|----------------------------|
| <b>30-Day Mortality</b>    |                                |                                |                                 |                            |
| <b>Medical</b>             | <b>10.3%</b><br>[10.15-10.39%] | <b>11.1%</b><br>[10.40-11.74%] | -0.80%<br>[-1.50- -0.10%]       | 0.03                       |
| <b>Surgical</b>            | <b>2.1%</b><br>[1.99-2.12%]    | <b>2.8%</b><br>[2.36-3.14%]    | -0.70%<br>[-1.11- -0.28%]       | <b>0.001</b>               |
| <b>30-Day Readmissions</b> |                                |                                |                                 |                            |
| <b>Medical</b>             | <b>21.9%</b><br>[21.66-22.11%] | <b>22.8%</b><br>[21.50-24.17%] | -0.96%<br>[-2.33-0.42%]         | 0.17                       |
| <b>Surgical</b>            | <b>13.9%</b><br>[13.48-14.28%] | <b>15.0%</b><br>[13.16-16.86%] | -1.13%<br>[-3.08-0.81%]         | 0.25                       |

<sup>a</sup>Adjusted for patient and hospital characteristics and HRR fixed effects.

<sup>b</sup>A p-value less than 0.0125 was considered significant.
